RESEARCH ARTICLE

# Interleukin (IL)-1 $\beta$ Is a Strong Inducer of IL-36 $\gamma$ Expression in Human Colonic Myofibroblasts

Kenichiro Takahashi<sup>1</sup>, Atsushi Nishida<sup>1\*</sup>, Makoto Shioya<sup>1</sup>, Hirotsugu Imaeda<sup>1</sup>, Shigeki Bamba<sup>1</sup>, Osamu Inatomi<sup>1</sup>, Tomoharu Shimizu<sup>2</sup>, Katsuyuki Kitoh<sup>1</sup>, Akira Andoh<sup>1</sup>

**1** Department of Medicine, Shiga University of Medical Science, Seta-Tukinowa, Otsu 520–2192, Japan, **2** Department of Surgery, Shiga University of Medical Science, Seta-Tukinowa, Otsu 520–2192, Japan

\* [astuda@belle.shiga-med.ac.jp](mailto:astuda@belle.shiga-med.ac.jp)

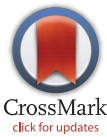

**OPEN ACCESS**

**Citation:** Takahashi K, Nishida A, Shioya M, Imaeda H, Bamba S, Inatomi O, et al. (2015) Interleukin (IL)-1 $\beta$  Is a Strong Inducer of IL-36 $\gamma$  Expression in Human Colonic Myofibroblasts. PLoS ONE 10(11): e0138423. doi:10.1371/journal.pone.0138423

**Editor:** Wenhui Hu, Temple University School of Medicine, UNITED STATES

**Received:** March 20, 2015

**Accepted:** August 30, 2015

**Published:** November 12, 2015

**Copyright:** © 2015 Takahashi et al. This is an open access article distributed under the terms of the [Creative Commons Attribution License](https://creativecommons.org/licenses/by/4.0/), which permits unrestricted use, distribution, and reproduction in any medium, provided the original author and source are credited.

**Data Availability Statement:** All relevant data are within the paper.

**Funding:** This study was supported in part by a Grant-in-Aid for Scientific Research from the Ministry of Education, Culture, Sports, Science and Technology of Japan (15K08967), a grant for the Intractable Diseases from the Ministry of Health, Labor and Welfare of Japan (067), a grant from the Practical Research Project for Rare/Intractable Diseases from Japan Agency for Medical Research and development, AMED (The Japan Agency of Medical Research and Development) (15AeK0109047h0002), and a grant from Smoking

## Abstract

### Backgrounds and aims

Interleukin (IL)-36 cytokines are members of the IL-1 cytokine family. In this study, we investigated the expression of IL-36 $\gamma$  in human colonic myofibroblasts to explore the molecular mechanisms underlying IL-36 $\gamma$  induction.

### Materials and methods

IL-36 mRNA was analyzed by real-time PCR method. Secretion of IL-36 $\gamma$  protein was evaluated by Western blot and ELISA analyses. Molecular mechanism of IL-36 $\gamma$  induction was evaluated by siRNA analyses and immunofluorescence experiments.

### Results

IL-36 $\gamma$  mRNA expression was scarcely detected in the cells without stimulation. IL-1 $\beta$  induced a marked increase of IL-36 $\gamma$  mRNA expression. TNF- $\alpha$  markedly enhanced IL-1 $\beta$ -induced IL-36 $\gamma$  mRNA expression. These responses were confirmed at the protein levels. The inhibitors for ERK1/2 (PD98059 and U0216) and a p38 MAPK (SB203580) significantly reduced the IL-1 $\beta$ -induced IL-36 $\gamma$  mRNA expression. In addition, the siRNAs specific for NF- $\kappa$ B p65 and AP-1 (c-Jun) significantly reduced the expression of IL-1 $\beta$ -induced IL-36 $\gamma$  mRNA.

### Conclusions

Colonic myofibroblasts are cellular source of IL-36 $\gamma$  in the intestine. IL-36 $\gamma$  expression was induced by the combination of IL-1 $\beta$  and TNF- $\alpha$  via activation of MAPKs and transcription factors, NF- $\kappa$ B and AP-1.

## Introduction

Inflammatory bowel diseases (IBD), ulcerative colitis (UC) and Crohn's disease [1], are chronic intestinal disorders of unknown etiology. The pathogenesis of IBD is thought to be an aberrant response of the mucosal immune system towards luminal antigens such as dietary factors and/

Research Foundation (1848) ([www.srf.or.jp/english/index.html](http://www.srf.or.jp/english/index.html)). The funders had no role in study design, data collection and analysis, decision to publish, or preparation of the manuscript.

**Competing Interests:** The authors have declared that no competing interests exist.

or commensal bacteria in genetically susceptible individuals [2–5]. IBD is often characterized by an imbalance between the effector and the regulatory activities of intestinal immunity, with a preponderance of proinflammatory cytokines [6, 7].

IL-36 $\alpha$  (previously known as IL-1F6), IL-36 $\beta$  (IL-1F8) and IL-36 $\gamma$  (IL-1F9) are recently reported members of the IL-1 cytokine family [8–10]. IL-36 cytokines have been identified initially through use of DNA data base searches for homologs to IL-1 [11]. They were classified as IL-1 family members based on amino acid sequence similarity, identity of gene structure, and predicted or known three-dimensional structure [11]. Each member of the IL-36 cytokines activates NF- $\kappa$ B and MAPK pathways [8, 11] via binding to a heterodimeric receptor consisting of the IL-36 receptor (IL-36R) subunit and the IL-1 receptor accessory protein (IL-1RAcP) [11, 12]. Recent studies showed that IL-36 cytokines contribute to the pathophysiology of chronic inflammatory disorders such as psoriasis [13–15], rheumatoid arthritis [16, 17] and pulmonary disease [18, 19]. However, there are no known reports regarding the association between IL-36 cytokines and chronic intestinal inflammation. Moreover, regulatory mechanisms underlying IL-36 induction remain unclear in any cell types.

In this study, we investigated the expression of IL-36 $\gamma$  in human colonic myofibroblasts to explore the mechanisms underlying IL-36 $\gamma$  induction. Colonic myofibroblasts are located sub-jacent to the basement membrane of the intestinal mucosa [20], and play critical roles in the pathophysiological processes involved in inflammation and mucosal healing in the intestine [20, 21]. To our knowledge, this is the first study demonstrating IL-36 $\gamma$  induction from the cells resident in the intestine and molecular mechanisms of IL-36 $\gamma$  induction. These responses suggest that IL-36 $\gamma$  might play an important role in the pathophysiology of gut inflammation.

## Materials and Methods

### Reagents

Recombinant human cytokines and anti-human IL-36 $\gamma$  were purchased from R&D Systems (Minneapolis, MN). Inhibitors of p42/44 MAPK (PD98059 and U0216) and inhibitor for p38 MAPK (SB203580) were purchased from Merck (Darmstadt, Germany). siRNA for NF- $\kappa$ B p65, c-Jun and a control siRNA were purchased from Santa Cruz (Santa Cruz, CA). Antibodies against phosphorylated and total p42/44 MAPK (ERK1/2), p38 MAPK, JNK1/2, GAPDH and laminin A/C were purchased from Cell Signaling Technology (Beverly, MA). Antibodies against phosphorylated c-Jun, NF- $\kappa$ B p65, phosphorylated I $\kappa$ B $\alpha$  were purchased from Santa Cruz. All other reagents were purchased from Sigma Chemical Co. (St Louis, MO).

### Culture of human colonic subepithelial myofibroblasts

The primary culture of human colonic myofibroblasts was prepared according to the method reported by Mahida et al [22]. The cellular characteristics and culture conditions have been described in our previous report [23]. Samples of the human adult colonic mucosa were obtained from healthy part of surgical specimens (>5 cm from the tumor margin) of patients undergoing a partial colectomy for carcinoma. The purity of subepithelial myofibroblasts was confirmed by  $\alpha$ -smooth muscle actin-positivity, and was above 95%. All studies were performed on passages 3–6 of myofibroblasts isolated from six resection specimens. The ethics committee of the Shiga University of Medical Science approved this project, and written informed consent was obtained from all patients.

## Immunocytochemistry for c-Jun and NF- $\kappa$ B p65

Cells were grown on a culture slide system (BD, Franklin Lakes, NJ), fixed with 4% paraformaldehyde and reacted with anti-phosphorylated c-Jun and anti-NF- $\kappa$ B p65 antibodies. Then, they were incubated with fluorescence-labeled second antibodies. Nuclei were visualized using mounting medium with DAPI (Vector Laboratories, Burlingame, CA). A digital confocal laser scanning microscope (Nikon, Tokyo, Japan) was used for analysis.

## Quantification of human IL-36 cytokines mRNA

The mRNA expression of IL-36 cytokines was assessed by reverse-transcription (RT)-PCR and real-time PCR analyses. The oligonucleotide primers used in this study were IL-36 $\gamma$  (sense: GTCTATCAATCAATGTGTAAACC, anti-sense: ATCTTCTG-CTCTTTTAGCTGCAAT) [24] and  $\beta$ -actin (sense: TGACCCAGATCATGT-TTGAGACCT, anti-sense: CCACGTCACA CTTCATGATGATGGAG). The real-time PCR was performed using a Light Cycler 480 system (Roche Applied Science). The PCR was performed using a SYBR Premix Ex Taq (TAKA RA, Japan). The data were normalized versus  $\beta$ -actin for human IL-36 $\gamma$ .

## ELISA for IL-36 $\gamma$

IL-36 $\gamma$  protein in the cell culture supernatant was quantified by an ELISA kit, purchased from Uscn Life Science (Wuhan, China).

## Western blot analysis

The cells were lysed in a SDS sample buffer containing orthovanadate. Western blot was performed according to a method previously described [25]. The detection was performed using the enhanced chemiluminescence Western blotting system (GE Healthcare, Little Chalfont, UK). Nuclear proteins were extracted using the CelLytic NuCLEAR Extraction Kit (Sigma-Aldrich, St. Louis, MO) and were subjected to Western blot analyses.

## NF- $\kappa$ B p65 and c-Jun mRNA interference (RNAi) experiments

siRNA duplex for NF- $\kappa$ B p65 and c-Jun was mixed with Lipofectamine™ RNAi MAX Reagent (Invitrogen, Carlsbad, CA) in Opti-MEM™ medium and incubated with the cells for 60 hours.

## Statistical Analysis

The statistical significance of the differences was determined by Student's t-test (GraphPad Prism 6.0; GraphPad Software, Inc., La Jolla, CA). One-way analysis of variance (one-way ANOVA) with Bonferroni post-test (GraphPad Prism 6.0; GraphPad Software, Inc.) was used in dose- and time-dependent study. Differences resulting in P values less than 0.05 were considered to be statistically significant.

## Results

### IL-36 $\gamma$ expression in human colonic myofibroblasts

IL-36 $\gamma$  mRNA expression was investigated in human colonic myofibroblasts. The cells were cultured for 24h in the absence or presence of cytokines (100 ng/ml), and IL-36 $\gamma$  mRNA expression was analyzed by real-time PCR. As shown in Fig 1A, IL-36 $\gamma$  mRNA expression was scarcely detected in the cells cultured in medium alone. A marked and significant increase of IL-36 $\gamma$  mRNA expression was induced by IL-1 $\beta$ . Western blot analyses showed intracellular IL-36 $\gamma$  protein expression in response to IL-1 $\beta$  stimulation (Fig 1B).

A

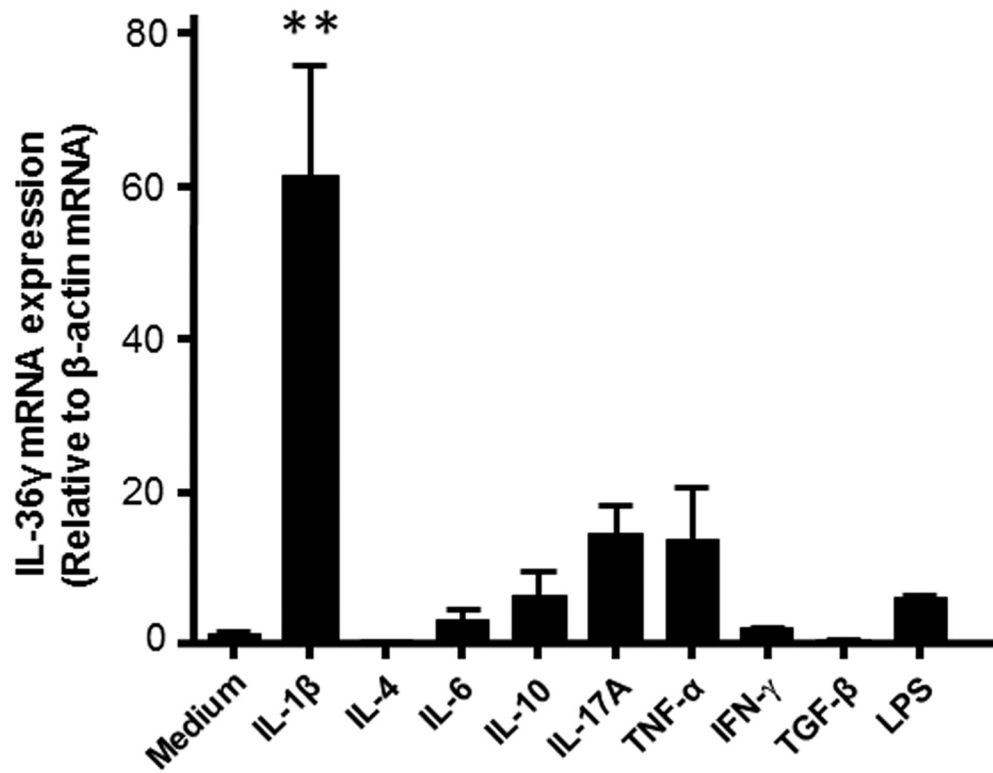

B

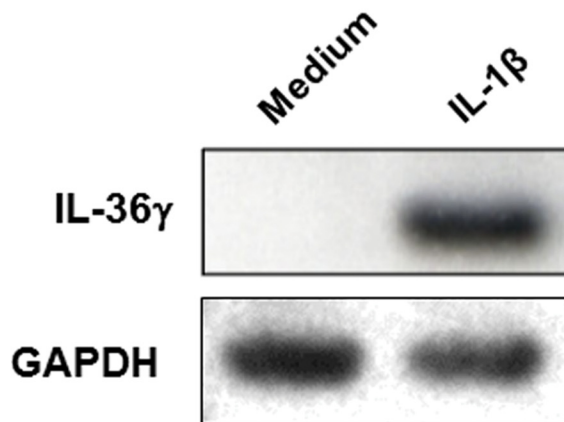

**Fig 1. IL-36 $\gamma$  mRNA and protein expression in human colonic myofibroblasts.** (A) IL-36 $\gamma$  mRNA expression in human colonic myofibroblasts. The cells were stimulated with cytokines (100 ng/ml) for 24h, and IL-36 $\gamma$  mRNA expression was analyzed by real-time PCR. IL-36 $\gamma$  mRNA expression was expressed as relative to  $\beta$ -actin mRNA expression (mean  $\pm$  SD from 4 different experiments). \*\* $P < 0.01$  versus medium only. (B) IL-36 $\gamma$  protein expression. The cells were stimulated with or without IL-1 $\beta$  (10 ng/ml) for 24h, and intracellular IL-36 $\gamma$  was analyzed by Western blot.

doi:10.1371/journal.pone.0138423.g001

### IL-36 $\gamma$ induction by IL-1 $\beta$

Colonic myofibroblasts were stimulated for 24h with increasing concentrations of IL-1 $\beta$ , and expression of IL-36 $\gamma$  mRNA was determined by real-time PCR. As shown in [Fig 2A](#), IL-1 $\beta$

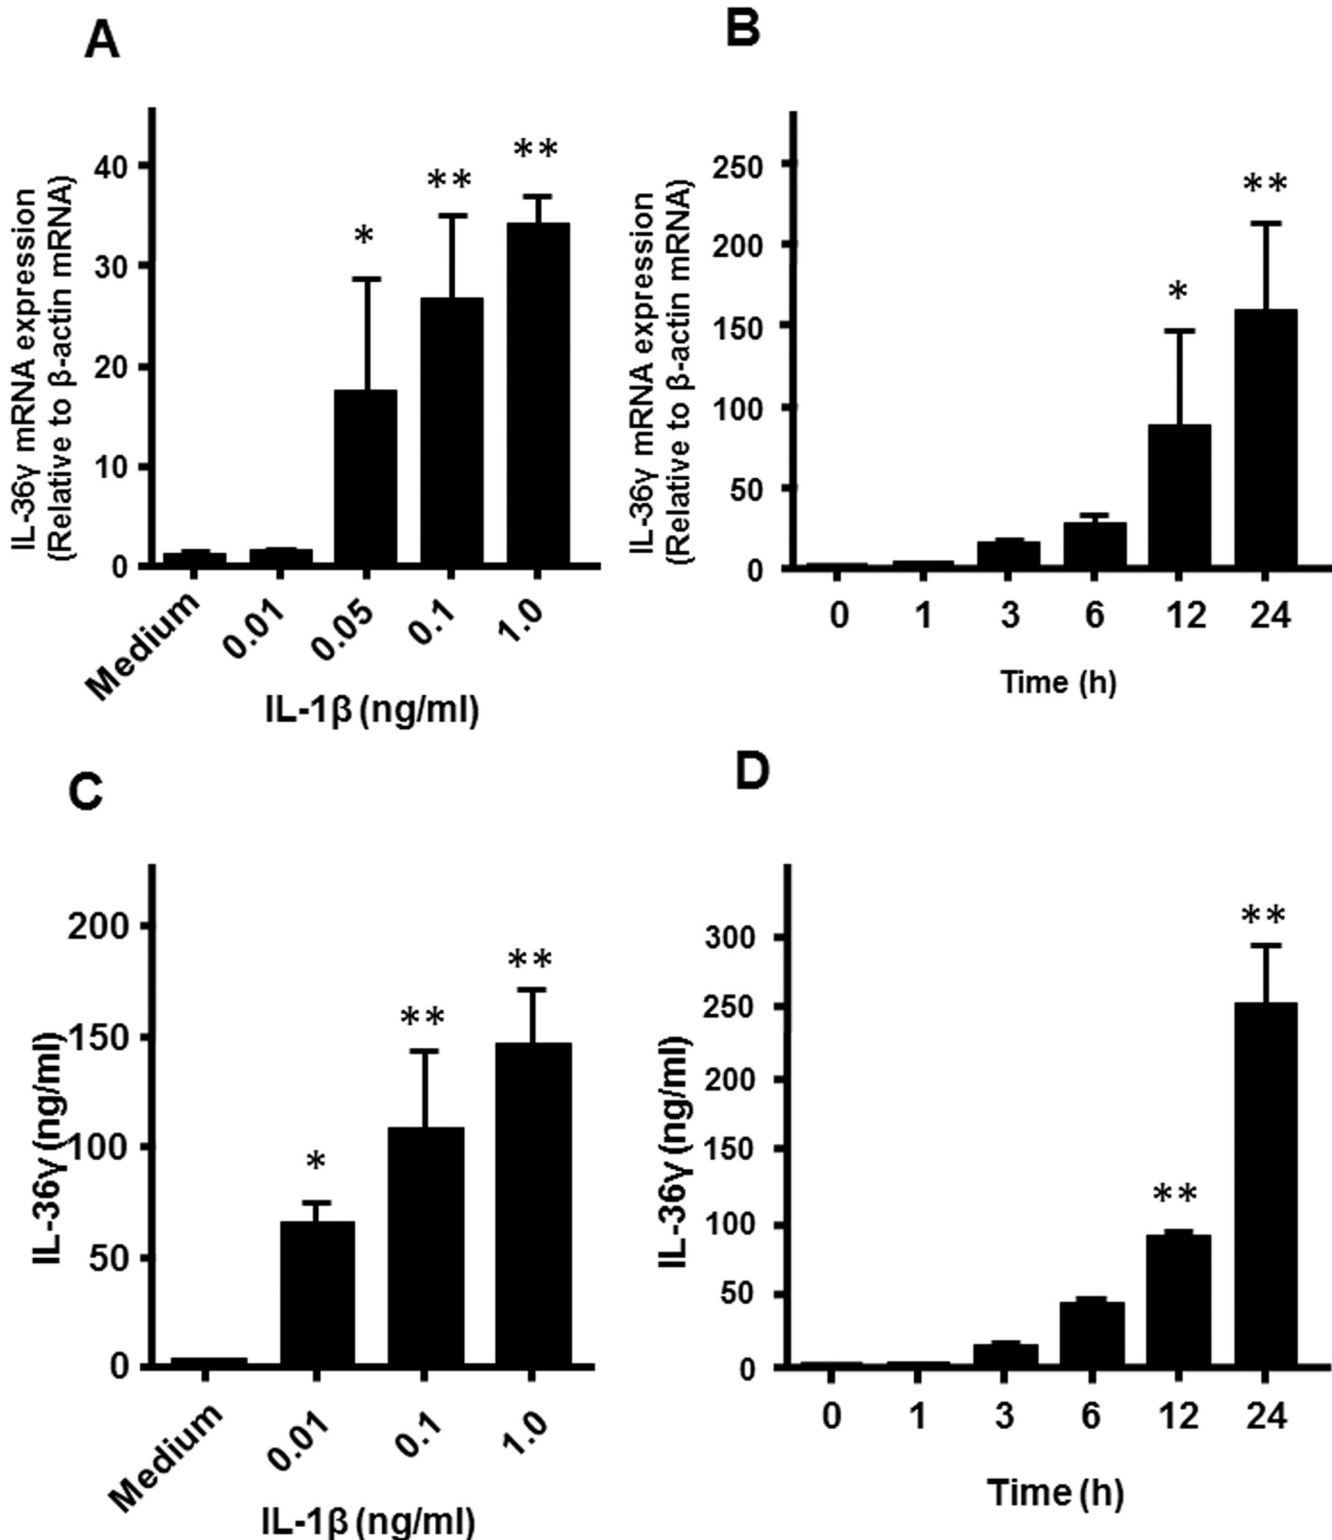

**Fig 2. Effects of IL-1β on IL-36γ mRNA expression in colonic myofibroblasts.** (A) Dose-dependent effects of IL-1β on IL-36γ mRNA expression. The cells were incubated for 24 h with increasing concentrations of IL-1β. IL-36γ mRNA expression was expressed relative to β-actin mRNA expression (mean ± SD from 4 different experiments). (B) Time-dependent effects of IL-1β on IL-36γ mRNA expression. The cells were stimulated with IL-1β (10 ng/ml) for the pre-determined times. IL-36γ mRNA expression was expressed relative to β-actin mRNA expression (mean ± SD from 4 different experiments). (C) Dose-dependent effects of IL-1β on IL-36γ secretion. The cells were incubated for 24 h with increasing concentrations of IL-1β. IL-36γ level in supernatant

was determined by ELISA (mean  $\pm$  SD from 4 different experiments). (D) Time-dependent effects of IL-1 $\beta$  on IL-36 $\gamma$  secretion. The cells were stimulated with IL-1 $\beta$  (10 ng/ml) for the pre-determined times. IL-36 $\gamma$  level was determined by ELISA (mean  $\pm$  SD from 4 different experiments). \* $P$ <0.05, \*\* $P$ <0.01 versus medium; ANOVA followed by Bonferroni's post hoc test.

doi:10.1371/journal.pone.0138423.g002

dose-dependently induced IL-36 $\gamma$  mRNA expression, and a significant effect was detected at 0.05 ng/ml of IL-1 $\beta$ . Furthermore, the kinetics of IL-36 $\gamma$  mRNA induction in response to IL-1 $\beta$  was analyzed. A significant induction of IL-36 $\gamma$  mRNA was detected as early as 3h after IL-1 $\beta$  stimulation, and then IL-36 $\gamma$  mRNA expression was time-dependently induced (Fig 2B).

The effects of IL-1 $\beta$  were evaluated at the protein level. Cells were stimulated for 24h with increasing concentrations of IL-1 $\beta$ , and secreted IL-36 $\gamma$  levels were determined by ELISA. As shown in Fig 2C, IL-1 $\beta$  dose-dependently induced IL-36 $\gamma$  secretion. IL-1 $\beta$  also induced time-dependent secretion of IL-36 $\gamma$  (Fig 2D).

### Combined effects of cytokines on IL-36 $\gamma$ mRNA expression

Colonic myofibroblasts were simulated for 24h with combination of IL-1 $\beta$  (10 ng/ml) plus various cytokines (100ng/ml). As shown in Fig 3A, simultaneous stimulation with IL-1 $\beta$  and TNF- $\alpha$  showed a synergistic increase of IL-36 $\gamma$  mRNA expression. This was also confirmed at the protein level by Western blot analysis (Fig 3B).

### Role of MAPK activation in IL-1 $\beta$ -induced IL-36 $\gamma$ mRNA expression

To investigate the molecular mechanisms underlying IL-1 $\beta$ -induced IL-36 $\gamma$  induction in colonic myofibroblasts, we evaluated whether the activation of MAPKs are involved in the IL-1 $\beta$ -induced IL-36 $\gamma$  mRNA expression. As shown in Fig 4A, IL-1 $\beta$  (10ng/ml) induced a phosphorylation of ERK1/2, p38 MAPK, and JNK1/2 as early as 5 min after stimulation. The addition of inhibitors for ERK1/2 (PD98059 and U0216) and a p38 MAPK inhibitor (SB203580) significantly reduced IL-1 $\beta$ -induced IL-36 $\gamma$  mRNA expression (Fig 4B). These results indicated that IL-1 $\beta$ -induced IL-36 $\gamma$  induction was mediated by activation of ERK1/2 and p38 MAPKs.

### IL-1 $\beta$ -induced IL-36 $\gamma$ mRNA expression is mediated by activation of transcription factors NF- $\kappa$ B and AP-1

Next, we assessed the role of the transcriptional factors NF- $\kappa$ B and AP-1 in the IL-1 $\beta$ -induced IL-36 $\gamma$  mRNA expression. Activation of the NF- $\kappa$ B is initiated by the signal-induced degradation of I $\kappa$ B proteins by the proteasome [26]. The activated NF- $\kappa$ B is then translocated into the nucleus where it binds to specific sequences of DNA [26]. In colonic myofibroblasts, Western blot analysis showed that IL-1 $\beta$  rapidly induced a phosphorylation of I $\kappa$ B $\alpha$  within 5 min, and this was completely degraded 15 min after IL-1 $\beta$  stimulation (Fig 5A). As shown in Fig 5B, immunohistochemistry showed that NF- $\kappa$ B p65 was located in the cytosol in inactivated cells, and this was translocated into the nucleus 15 min after IL-1 $\beta$  stimulation. This was confirmed by Western blot for NF- $\kappa$ B p65 of nuclear extracts (Fig 5C). These indicate NF- $\kappa$ B activation in response to IL-1 $\beta$  in colonic myofibroblasts. The AP-1 (c-Jun) activation was also analyzed by immunohistochemical procedure. As shown in Fig 5B, phosphorylated c-Jun was detected as pink fluorescence 15 min after IL-1 $\beta$  stimulation (blue color indicates nuclear staining). In addition, Western blot analysis using nuclear extracts showed a rapid accumulation of phosphorylated c-Jun into the nucleus (Fig 5C). This indicates AP-1 (c-Jun) activation in response to IL-1 $\beta$ . These findings are supported by our previous experiments of EMSA (electrophoretic mobility shift assay) that IL-1 $\beta$  enhanced NF- $\kappa$ B- and AP-1-DNA binding activity in colonic myofibroblasts [27].

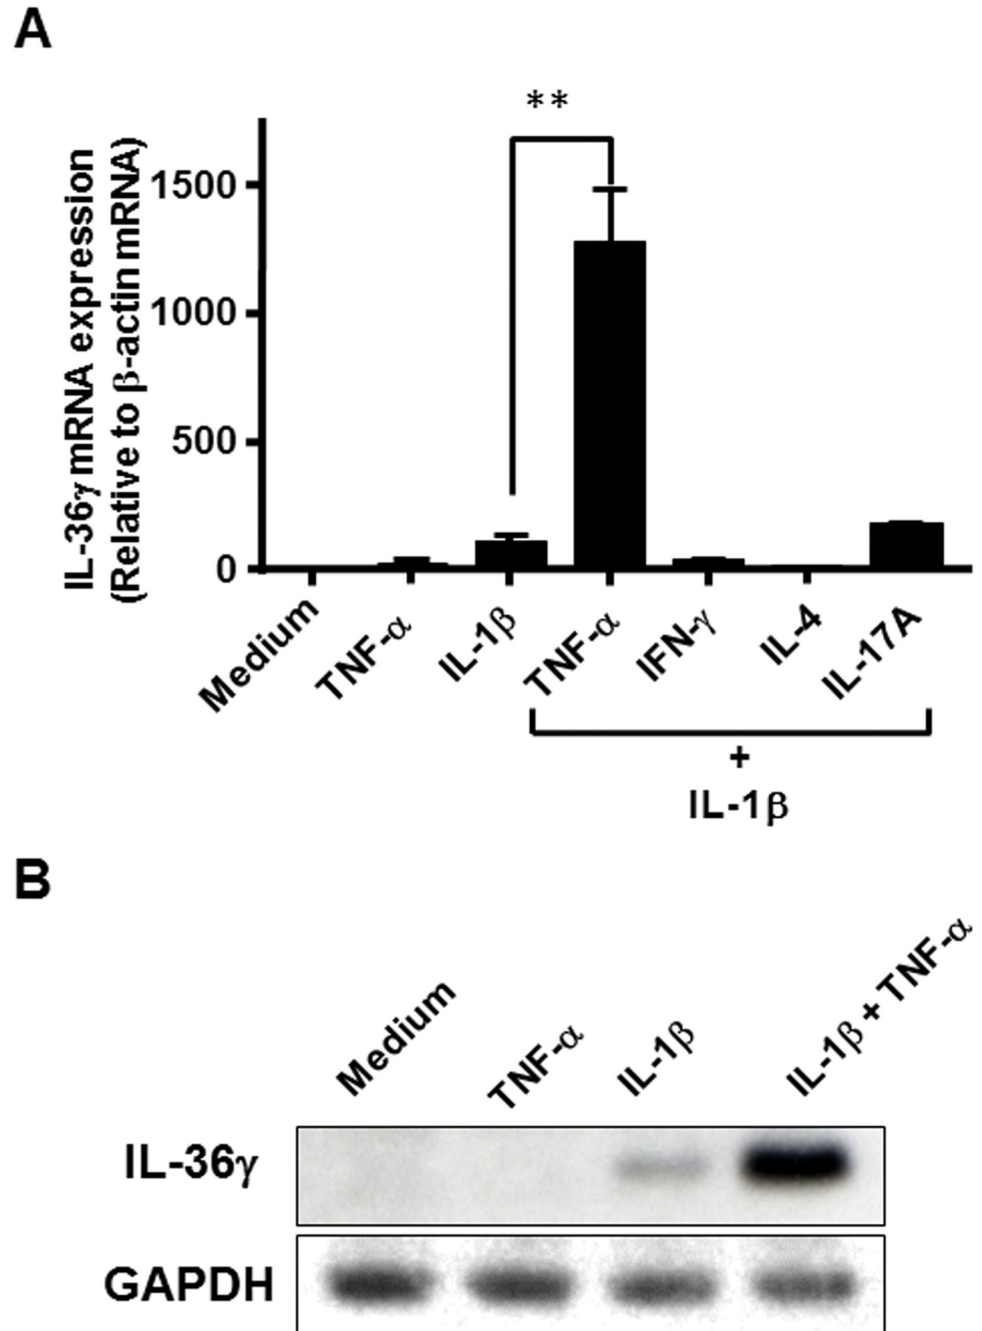

**Fig 3. Combined effects of IL-1 $\beta$  and other cytokines.** (A) The cells were incubated for 24 h with combination of IL-1 $\beta$  (10 ng/ml) and other cytokines [TNF- $\alpha$  (100 ng/ml), IFN- $\gamma$  (100 ng/ml), IL-4 (100 ng/ml), and/or IL-17A (100 ng/ml)]. IL-36 $\gamma$  mRNA expression was analyzed by real-time PCR. IL-36 $\gamma$  mRNA expression was expressed relative to the  $\beta$ -actin mRNA expression (mean  $\pm$  SD from 4 different experiments). \*\* $P$ <0.01 versus IL-1 $\beta$  alone. (B) The cells were stimulated for 24 h with or without IL-1 $\beta$  (10 ng/ml), TNF- $\alpha$  (100 ng/ml), and/or combination of IL-1 $\beta$  (10 ng/ml) and TNF- $\alpha$  (100 ng/ml), and intracellular IL-36 $\gamma$  was analyzed by Western blot.

doi:10.1371/journal.pone.0138423.g003

Based on these findings, we evaluated the effects of siRNAs specific for NF- $\kappa$ B p65 and AP-1 (c-Jun) on IL-1 $\beta$ -induced IL-36 $\gamma$  mRNA expression. As shown in Fig 5D, the control siRNA revealed no effect, and the silencing of NF- $\kappa$ B p65 and AP-1 (c-jun) significantly reduced the

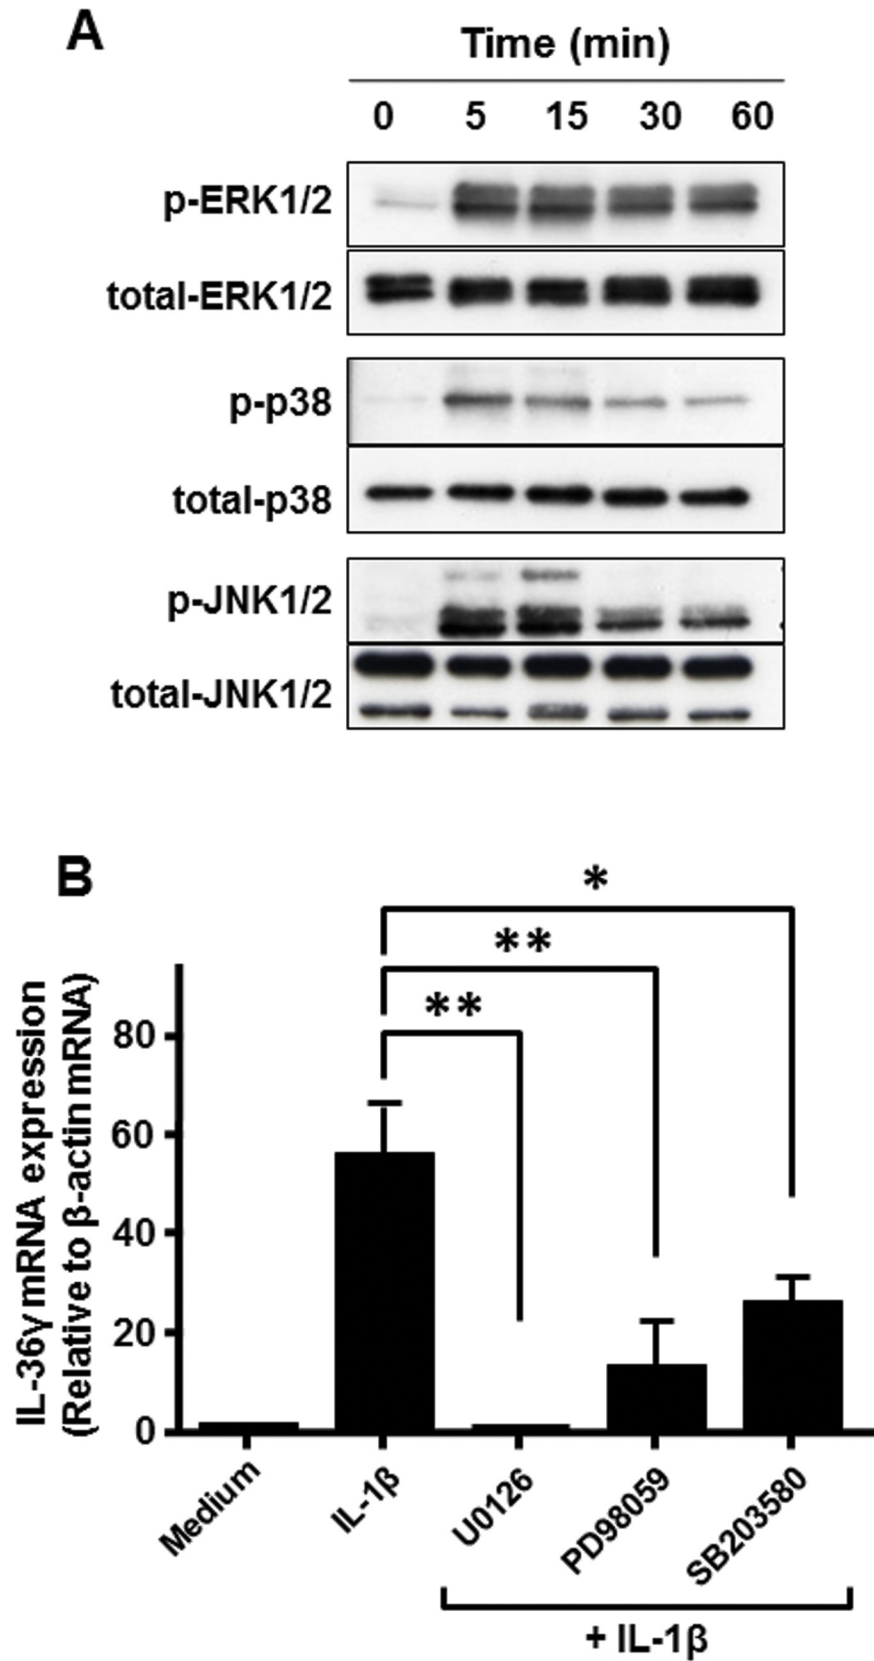



**Fig 4. Involvement of MAPK activation in IL-1 $\beta$ -induced IL-36 $\gamma$  expression.** (A) MAPK activation in colonic SEMFs. The cells were stimulated with IL-1 $\beta$  (10 ng/ml), and the activation of MAPKs were analyzed by Western blotting. Antibodies against phosphorylated (p)- and total- MAPKs were used. \* $P < 0.05$ , \*\* $P < 0.01$ . (B) The cells were stimulated for 24 h with IL-1 $\beta$  (10 ng/ml) in the presence or absence of MEK inhibitors [U0216 (10  $\mu$ M) and PD98059 (10  $\mu$ M)] and a p38 inhibitor [SB203580 (10  $\mu$ M)]. IL-36 $\gamma$  mRNA expression was analyzed by real-time PCR. IL-36 $\gamma$  mRNA expression was expressed relative to the  $\beta$ -actin mRNA expression (mean  $\pm$  SD from 4 different experiments).

doi:10.1371/journal.pone.0138423.g004

expression of IL-1 $\beta$ -induced IL-36 $\gamma$  mRNA. Collectively, these findings indicate that IL-1 $\beta$ -induced IL-36 $\gamma$  expression is mediated by the activation of transcriptional factors, NF- $\kappa$ B and AP-1.

## Discussion

IL-36 cytokines are reported to be involved in the pathogenesis of chronic inflammatory disorders such as psoriasis, lung inflammation, and rheumatoid arthritis [13, 15, 16]. However, there are no reports regarding the role of IL-36 cytokines in chronic intestinal inflammation, including IBD. Moreover, the molecular mechanism responsible for IL-36 $\gamma$  induction has not been identified in any cell types. To our knowledge, the current study is the first report concerning IL-36 $\gamma$  expression from the primary cultured cells isolated from human intestinal mucosa and its regulatory mechanism.

IL-36 $\alpha$  expression was shown by a variety of cells, including keratinocytes, T and B lymphocytes as well as monocytes in the lesions of rheumatoid arthritis and psoriasis [17, 28]. However, there is no report of IL-36 $\gamma$  expression in human colonic tissues. Colonic myofibroblasts have been reported to play a critical role in the gut inflammatory and regenerative responses through the expression of various active mediators including cytokines [20]. This leads us to investigate IL-36 $\gamma$  expression in these cells. Among various cytokines, we found that IL-1 $\beta$  is a strong inducer of IL-36 $\gamma$  in colonic myofibroblasts. TNF- $\alpha$  has been reported to induce IL-36 $\gamma$  in bronchial epithelial cells [19], but showed a minimal effect in colonic myofibroblasts. Interestingly, combination of IL-1 $\beta$  plus TNF- $\alpha$  exerted a remarkable effect on IL-36 $\gamma$  expression. These findings indicate that IL-36 $\gamma$  expression is mainly mediated by IL-1 $\beta$  and that TNF- $\alpha$  is also an important factor through synergistic effect with IL-1 $\beta$ . Collectively, colonic myofibroblasts are cellular source of IL-36 $\gamma$  in the intestinal mucosa, and two major proinflammatory cytokines, IL-1 $\beta$  and TNF- $\alpha$ , play a pivotal role in the induction of IL-36 $\gamma$ .

Molecular mechanisms underlying IL-36 $\gamma$  induction have not fully been identified in any cell types. At first, we investigated involvement of MAPKs in IL-1 $\beta$ -induced IL-36 $\gamma$  expression. MAPK activation has been reported as an important signaling event in response to proinflammatory stimuli [29]. Three subgroups of the MAPK family (the p44 and p42 ERK1/2, the p38 MAPK and the c-Jun NH2-terminal kinase) have been identified. These are phosphorylated on activation by upstream kinases, the MAPK kinases [29]. In this study, IL-1 $\beta$  induced a rapid activation of MAPKs in colonic myofibroblasts, and the role of the MAPKs in IL-1 $\beta$ -induced IL-36 $\gamma$  expression was assessed by using specific inhibitors. Imidazole compound SB203580 is a specific inhibitor of p38 MAPK [30], and induced a significant decrease in the IL-1 $\beta$ -induced IL-36 $\gamma$  mRNA expression. We also addressed the role of ERK1/2 in our system. PD98059 is a specific inhibitor of MAPK/ERK kinase (MEK1) [31], the kinase directly upstream to ERK1/2, and U0126 is a specific inhibitor of MEK1 and MEK2 [32]. PD98059 and U0126 caused a significant inhibition of the IL-1 $\beta$ -induced IL-36 $\gamma$  expression. Thus, we concluded that p38 and ERK1/2 MAPKs participate in the IL-36 $\gamma$  expression induced by IL-1 $\beta$  in human colonic myofibroblasts.

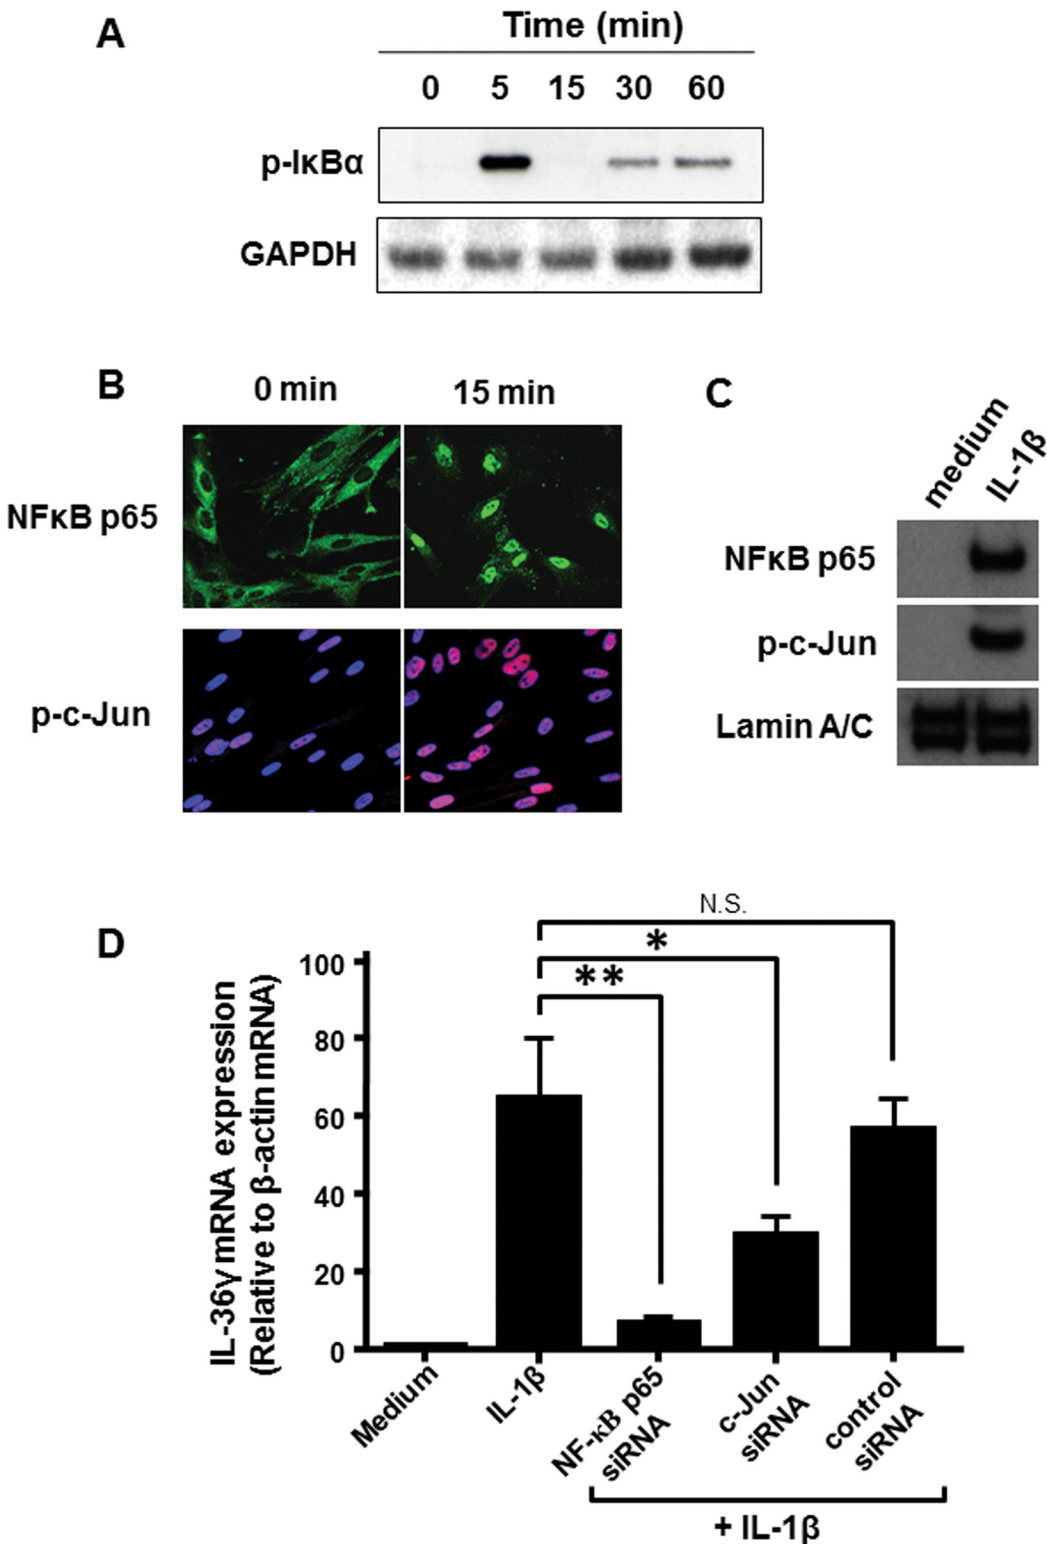

**Fig 5. Involvement of activation of transcription factors, NF- $\kappa$ B and /AP-1, in IL-1 $\beta$ -induced IL-36 $\gamma$  expression.** (A) IL-1 $\beta$  induced I $\kappa$ B $\alpha$  phosphorylation and degradation in colonic myofibroblasts. The cells were stimulated with IL-1 $\beta$  (10 ng/ml), and phosphorylated I $\kappa$ B $\alpha$  were detected by Western blotting. (B) IL-1 $\beta$  induced activation of NF- $\kappa$ B and c-Jun AP-1. The cells were stimulated with IL-1 $\beta$  (10 ng/ml), and NF- $\kappa$ B p65 and phosphorylated c-Jun were detected by immunocytochemistry. Reacted antibodies against NF- $\kappa$ B p65 were visualized by FITC (green fluorescence)-labeled second antibody. Reacted antibodies against phosphorylated c-Jun were detected by a DyLight<sup>®</sup> 594 (red fluorescence)-labeled secondary antibodies. Nucleus was stained by DAPI

(blue). (C) The cells were stimulated with IL-1 $\beta$  (10 ng/ml) or medium alone for 15 min and nuclear proteins were extracted. NF- $\kappa$ B p65 and phosphorylated c-Jun in nuclear extracts were detected by immunoblot. (D) Effects of silencing of NF- $\kappa$ B p65 and c-Jun AP-1 on IL-1 $\beta$ -induced IL-36 $\gamma$  expression. The cells were transfected with control siRNA, the siRNA specific for NF- $\kappa$ B p65 and/or c-Jun AP-1, and incubated for 24h. IL-36 $\gamma$  mRNA expression was analyzed by real-time PCR. IL-36 $\gamma$  mRNA expression was expressed relative to the  $\beta$ -actin mRNA expression (mean  $\pm$  SD from 4 different experiments). \* $P$  < 0.05, \*\* $P$  < 0.01 versus IL-1 $\beta$  stimulation.

doi:10.1371/journal.pone.0138423.g005

Many cytokine-inducible responses are mediated by DNA-binding proteins such as NF- $\kappa$ B [33]. IL-36 cytokines have been reported to activate NF- $\kappa$ B pathway [8, 11] via binding to a heterodimeric receptor consisting of IL-36R and IL-1RAcP [11, 12]. However, the role of NF- $\kappa$ B pathway in IL-36 induction has not been investigated previously. We demonstrated for the first time that the activation of NF- $\kappa$ B was necessary for IL-1 $\beta$ -induced IL-36 $\gamma$  expression in human colonic myofibroblasts. Evidences supporting this can be summarized. First, IL-1 $\beta$  rapidly induced a rapid activation of I $\kappa$ B $\alpha$  and translocation of NF- $\kappa$ B p65 into the nucleus. Second, inhibition of NF- $\kappa$ B activation by siRNA induced a marked decrease in IL-1 $\beta$ -induced IL-36 $\gamma$  expression. Furthermore, we also found a critical role of c-Jun AP-1 in IL-1 $\beta$ -induced IL-36 $\gamma$  expression in colonic myofibroblasts. The activation of c-Jun AP-1 was induced by IL-1 $\beta$  stimulation and blocking of c-Jun using siRNA significantly reduced the IL-1 $\beta$ -induced IL-36 $\gamma$  expression. As a limitation, we could not show direct evidence that IL-1 $\beta$  induced the binding of NF- $\kappa$ B and AP-1 to the IL-36 $\gamma$  promoter region. So, possible contribution of other mechanisms, such as MAPKs-mediated post-transcriptional mechanism reported in IL-8 mRNA expression [34], should be investigated in the future. Taken together, it was suggested that NF- $\kappa$ B and AP-1 play a critical role in IL-1 $\beta$ -induced IL-36 $\gamma$  expression in colonic myofibroblasts.

The function of IL-36 cytokines in intestinal inflammatory disorders still remains unclear. It is well recognized that increased T cell responses play a critical role in the pathophysiology of chronic inflammatory disorders [3]. Vigne et al. reported that IL-36R was predominantly expressed on naïve CD4<sup>+</sup> T cells and that IL-36 cytokines directly stimulates proliferation and IL-2 secretion of T cells [35]. IL-36 signaling directly promoted Th1 polarization of naïve CD4<sup>+</sup> T cells [35] and induced Th17 immune response [36]. Mutamba et al. have reported that IL-36 $\gamma$  stimulates maturation of monocyte-derived dendritic cells [37]. In addition, preliminary experiment in our laboratory showed that IL-36 stimulates chemokine secretion from colonic myofibroblasts, suggesting IL-36-mediated autocrine loop of inflammation in colonic myofibroblasts. At present, there are no known reports regarding the association between IL-36 and chronic intestinal inflammation. However, accumulating data suggest an involvement of IL-36 in the pathophysiology of chronic intestinal inflammation.

In conclusion, we showed IL-36 $\gamma$  secretion from human colonic myofibroblasts. In addition, we found that IL-1 $\beta$  is a strong inducer of IL-36 $\gamma$  expression via MAPK pathways and NF- $\kappa$ B/AP-1 activation.

## Acknowledgments

This study was supported in part by a Grant-in-Aid for Scientific Research from the Ministry of Education, Culture, Sports, Science and Technology of Japan (15K08967), a grant for the Intractable Diseases from the Ministry of Health, Labor and Welfare of Japan (067), a grant from the Practical Research Project for Rare/Intractable Diseases from Japan Agency for Medical Research and development, AMED (The Japan Agency of Medical Research and Development) (15AeK0109047h0002), and a grant from Smoking Research Foundation (1848) ([www.srf.or.jp/](http://www.srf.or.jp/)).

[srf.or.jp/english/index.html](http://srf.or.jp/english/index.html)). The funders had no role in study design, data collection and analysis, decision to publish, or preparation of the manuscript.

## Author Contributions

Conceived and designed the experiments: KT AN AA. Performed the experiments: KT AN. Analyzed the data: KT. Contributed reagents/materials/analysis tools: KT AN HI SB OI TS KK AA MS. Wrote the paper: AA KT AN.

## References

1. Epstein J, Sanderson IR, Macdonald TT. Curcumin as a therapeutic agent: the evidence from in vitro, animal and human studies. *The British journal of nutrition*. 2010; 103(11):1545–57. doi: [10.1017/S0007114509993667](https://doi.org/10.1017/S0007114509993667) PMID: [20100380](https://pubmed.ncbi.nlm.nih.gov/20100380/)
2. Podolsky DK. Inflammatory bowel disease. *N Engl J Med*. 2002; 347(6):417–29. PMID: [12167685](https://pubmed.ncbi.nlm.nih.gov/12167685/)
3. Goldsmith JR, Sartor RB. The role of diet on intestinal microbiota metabolism: downstream impacts on host immune function and health, and therapeutic implications. *J Gastroenterol*. 2014; 49(5):785–98. doi: [10.1007/s00535-014-0953-z](https://doi.org/10.1007/s00535-014-0953-z) PMID: [24652102](https://pubmed.ncbi.nlm.nih.gov/24652102/)
4. Mukai A, Iijima H, Hiyama S, Fujii H, Shinzaki S, Inoue T, et al. Regulation of energy-related ubiquitin E3 ligase, GRAIL, in murine models of colitis and patients with Crohn's disease. *J Gastroenterol*. 2014; 49(12):1524–35. doi: [10.1007/s00535-013-0923-x](https://doi.org/10.1007/s00535-013-0923-x) PMID: [24356810](https://pubmed.ncbi.nlm.nih.gov/24356810/)
5. Sheehan D, Moran C, Shanahan F. The microbiota in inflammatory bowel disease. *J Gastroenterol*. 2015; 50(5):495–507. doi: [10.1007/s00535-015-1064-1](https://doi.org/10.1007/s00535-015-1064-1) PMID: [25808229](https://pubmed.ncbi.nlm.nih.gov/25808229/)
6. Imaeda H, Bamba S, Takahashi K, Fujimoto T, Ban H, Tsujikawa T, et al. Relationship between serum infliximab trough levels and endoscopic activities in patients with Crohn's disease under scheduled maintenance treatment. *J Gastroenterol*. 2014; 49(4):674–82. doi: [10.1007/s00535-013-0829-7](https://doi.org/10.1007/s00535-013-0829-7) PMID: [23666424](https://pubmed.ncbi.nlm.nih.gov/23666424/)
7. Mayer L. Evolving paradigms in the pathogenesis of IBD. *J Gastroenterol*. 2010; 45(1):9–16. doi: [10.1007/s00535-009-0138-3](https://doi.org/10.1007/s00535-009-0138-3) PMID: [19960355](https://pubmed.ncbi.nlm.nih.gov/19960355/)
8. Dinarello C, Arend W, Sims J, Smith D, Blumberg H, O'Neill L, et al. IL-1 family nomenclature. *Nat Immunol*. 2010; 11(11):973. doi: [10.1038/ni1110-973](https://doi.org/10.1038/ni1110-973) PMID: [20959797](https://pubmed.ncbi.nlm.nih.gov/20959797/)
9. Tripodi D, Conti F, Rosati M, Maccauro G, Saggini A, Cianchetti E, et al. IL-36 a new member of the IL-1 family cytokines. *J Biol Regul Homeost Agents*. 2012; 26(1):7–14. PMID: [22475093](https://pubmed.ncbi.nlm.nih.gov/22475093/)
10. Sims JE, Smith DE. The IL-1 family: regulators of immunity. *Nat Rev Immunol*. 2010; 10(2):89–102. doi: [10.1038/nri2691](https://doi.org/10.1038/nri2691) PMID: [20081871](https://pubmed.ncbi.nlm.nih.gov/20081871/)
11. Towne JE, Garka KE, Renshaw BR, Virca GD, Sims JE. Interleukin (IL)-1F6, IL-1F8, and IL-1F9 signal through IL-1Rrp2 and IL-1RAcP to activate the pathway leading to NF-kappaB and MAPKs. *J Biol Chem*. 2004; 279(14):13677–88. PMID: [14734551](https://pubmed.ncbi.nlm.nih.gov/14734551/)
12. Towne JE, Renshaw BR, Douangpanya J, Lipsky BP, Shen M, Gabel CA, et al. Interleukin-36 (IL-36) ligands require processing for full agonist (IL-36alpha, IL-36beta, and IL-36gamma) or antagonist (IL-36Ra) activity. *J Biol Chem*. 2011; 286(49):42594–602. doi: [10.1074/jbc.M111.267922](https://doi.org/10.1074/jbc.M111.267922) PMID: [21965679](https://pubmed.ncbi.nlm.nih.gov/21965679/)
13. Blumberg H, Dinh H, Trueblood ES, Pretorius J, Kugler D, Weng N, et al. Opposing activities of two novel members of the IL-1 ligand family regulate skin inflammation. *J Exp Med*. 2007; 204(11):2603–14. PMID: [17908936](https://pubmed.ncbi.nlm.nih.gov/17908936/)
14. Blumberg H, Dinh H, Dean C Jr., Trueblood ES, Bailey K, Shows D, et al. IL-1RL2 and its ligands contribute to the cytokine network in psoriasis. *J Immunol*. 2010; 185(7):4354–62. doi: [10.4049/jimmunol.1000313](https://doi.org/10.4049/jimmunol.1000313) PMID: [20833839](https://pubmed.ncbi.nlm.nih.gov/20833839/)
15. Carrier Y, Ma HL, Ramon HE, Napierata L, Small C, O'Toole M, et al. Inter-regulation of Th17 cytokines and the IL-36 cytokines in vitro and in vivo: implications in psoriasis pathogenesis. *J Invest Dermatol*. 2011; 131(12):2428–37. doi: [10.1038/jid.2011.234](https://doi.org/10.1038/jid.2011.234) PMID: [21881584](https://pubmed.ncbi.nlm.nih.gov/21881584/)
16. Magne D, Palmer G, Barton JL, Mezin F, Talbot-Ayer D, Bas S, et al. The new IL-1 family member IL-1F8 stimulates production of inflammatory mediators by synovial fibroblasts and articular chondrocytes. *Arthritis Res Ther*. 2006; 8(3):R80. PMID: [16646978](https://pubmed.ncbi.nlm.nih.gov/16646978/)
17. Frey S DA, Messbacher ME, Baeten DL, Bugatti S, Montecucco C, Schett G, Hueber AJ. The novel cytokine interleukin-36 $\alpha$  is expressed in psoriatic and rheumatoid arthritis synovium. *Ann Rheum Dis*. 2013; 72(9):1569–74. doi: [10.1136/annrheumdis-2012-202264](https://doi.org/10.1136/annrheumdis-2012-202264) PMID: [23268368](https://pubmed.ncbi.nlm.nih.gov/23268368/)

18. Ramadas RA, Ewart SL, Medoff BD, LeVine AM. Interleukin-1 family member 9 stimulates chemokine production and neutrophil influx in mouse lungs. *Am J Respir Cell Mol Biol*. 2011; 44(2):134–45. doi: [10.1165/rcmb.2009-0315OC](https://doi.org/10.1165/rcmb.2009-0315OC) PMID: [20299540](https://pubmed.ncbi.nlm.nih.gov/20299540/)
19. Chustz RT, Nagarkar DR, Poposki JA, Favoreto S Jr., Avila PC, Schleimer RP, et al. Regulation and function of the IL-1 family cytokine IL-1F9 in human bronchial epithelial cells. *Am J Respir Cell Mol Biol*. 2011; 45(1):145–53. doi: [10.1165/rcmb.2010-0075OC](https://doi.org/10.1165/rcmb.2010-0075OC) PMID: [20870894](https://pubmed.ncbi.nlm.nih.gov/20870894/)
20. Powell DW, Mifflin RC, Valentich JD, Crowe SE, Saada JI, West AB. Myofibroblasts. I. Paracrine cells important in health and disease. *Am J Physiol*. 1999; 277(1 Pt 1):C1–9. PMID: [10409103](https://pubmed.ncbi.nlm.nih.gov/10409103/)
21. Kobori A, Yagi Y, Imaeda H, Ban H, Bamba S, Tsujikawa T, et al. Interleukin-33 expression is specifically enhanced in inflamed mucosa of ulcerative colitis. *J Gastroenterol*. 2010; 45(10):999–1007. doi: [10.1007/s00535-010-0245-1](https://doi.org/10.1007/s00535-010-0245-1) PMID: [20405148](https://pubmed.ncbi.nlm.nih.gov/20405148/)
22. Mahida YR, Beltinger J, Makh S, Goke M, Gray T, Podolsky DK, et al. Adult human colonic subepithelial myofibroblasts express extracellular matrix proteins and cyclooxygenase-1 and -2. *Am J Physiol*. 1997; 273(6 Pt 1):G1341–8. PMID: [9435560](https://pubmed.ncbi.nlm.nih.gov/9435560/)
23. Okuno T, Andoh A, Bamba S, Araki Y, Fujiyama Y, Fujiyama M, et al. Interleukin-1β and tumor necrosis factor-α induce chemokine and matrix metalloproteinase gene expression in human colonic subepithelial myofibroblasts. *Scand J Gastroenterol*. 2002; 37(3):317–24. PMID: [11916194](https://pubmed.ncbi.nlm.nih.gov/11916194/)
24. Bachmann M, Scheiermann P, Hardle L, Pfeilschifter J, Muhl H. IL-36γ/IL-1F9, an innate T-bet target in myeloid cells. *J Biol Chem*. 2012; 287(50):41684–96. doi: [10.1074/jbc.M112.385443](https://doi.org/10.1074/jbc.M112.385443) PMID: [23095752](https://pubmed.ncbi.nlm.nih.gov/23095752/)
25. Shimada M, Andoh A, Hata K, Tasaki K, Araki Y, Fujiyama Y, et al. IL-6 secretion by human pancreatic peri-acinar myofibroblasts in response to inflammatory mediators. *J Immunol*. 2002; 168(2):861–8. PMID: [11777983](https://pubmed.ncbi.nlm.nih.gov/11777983/)
26. Gilmore TD. Introduction to NF-κB: players, pathways, perspectives. *Oncogene*. 2006; 25(51):6680–4. PMID: [17072321](https://pubmed.ncbi.nlm.nih.gov/17072321/)
27. Hata K, Andoh A, Shimada M, Fujino S, Bamba S, Araki Y, et al. IL-17 stimulates inflammatory responses via NF-κB and MAP kinase pathways in human colonic myofibroblasts. *Am J Physiol Gastrointest Liver Physiol*. 2002; 282(6):G1035–44. PMID: [12016129](https://pubmed.ncbi.nlm.nih.gov/12016129/)
28. Smith DE, Renshaw BR, Ketchem RR, Kubin M, Garka KE, Sims JE. Four new members expand the interleukin-1 superfamily. *J Biol Chem*. 2000; 275(2):1169–75. PMID: [10625660](https://pubmed.ncbi.nlm.nih.gov/10625660/)
29. Cobb MH, Goldsmith EJ. How MAP kinases are regulated. *J Biol Chem*. 1995; 270(25):14843–6. PMID: [7797459](https://pubmed.ncbi.nlm.nih.gov/7797459/)
30. Cuenda A, Rouse J, Doza YN, Meier R, Cohen P, Gallagher TF, et al. SB 203580 is a specific inhibitor of a MAP kinase homologue which is stimulated by cellular stresses and interleukin-1. *FEBS Lett*. 1995; 364(2):229–33. PMID: [7750577](https://pubmed.ncbi.nlm.nih.gov/7750577/)
31. Alessi DR, Cuenda A, Cohen P, Dudley DT, Saltiel AR. PD 098059 is a specific inhibitor of the activation of mitogen-activated protein kinase kinase in vitro and in vivo. *J Biol Chem*. 1995; 270(46):27489–94. PMID: [7499206](https://pubmed.ncbi.nlm.nih.gov/7499206/)
32. Favata MF, Horiuchi KY, Manos EJ, Daulerio AJ, Stradley DA, Feeser WS, et al. Identification of a novel inhibitor of mitogen-activated protein kinase kinase. *J Biol Chem*. 1998; 273(29):18623–32. PMID: [9660836](https://pubmed.ncbi.nlm.nih.gov/9660836/)
33. Lenardo MJ, Baltimore D. NF-κB: a pleiotropic mediator of inducible and tissue-specific gene control. *Cell*. 1989; 58(2):227–9. PMID: [2665943](https://pubmed.ncbi.nlm.nih.gov/2665943/)
34. Lin CH, Wang YH, Chen YW, Lin YL, Chen BC, Chen MC. Transcriptional and posttranscriptional regulation of CXCL8/IL-8 gene expression induced by connective tissue growth factor. *Immunol Res*. 2015.
35. Vigne S, Palmer G, Martin P, Lamacchia C, Strebel D, Rodriguez E, et al. IL-36 signaling amplifies Th1 responses by enhancing proliferation and Th1 polarization of naive CD4+ T cells. *Blood*. 2012; 120(17):3478–87. doi: [10.1182/blood-2012-06-439026](https://doi.org/10.1182/blood-2012-06-439026) PMID: [22968459](https://pubmed.ncbi.nlm.nih.gov/22968459/)
36. Gresnigt MS, Rosler B, Jacobs CW, Becker KL, Joosten LA, van der Meer JW, et al. The IL-36 receptor pathway regulates *Aspergillus fumigatus*-induced Th1 and Th17 responses. *Eur J Immunol*. 2013; 43(2):416–26. doi: [10.1002/eji.201242711](https://doi.org/10.1002/eji.201242711) PMID: [23147407](https://pubmed.ncbi.nlm.nih.gov/23147407/)
37. Mutamba S, Allison A, Mahida Y, Barrow P, Foster N. Expression of IL-1Rrp2 by human myelomonocytic cells is unique to DCs and facilitates DC maturation by IL-1F8 and IL-1F9. *Eur J Immunol*. 2012; 42(3):607–17. doi: [10.1002/eji.201142035](https://doi.org/10.1002/eji.201142035) PMID: [22144259](https://pubmed.ncbi.nlm.nih.gov/22144259/)
